# Supplementary material
Source: publisher figshare collection journal article supplement (https://acs.figshare.com/ndownloader/files/24623947)
Supplement: Supplementary file 1 [file 24623947]

# **Supplemental Information for**

## **Dynamic range expansion by gas-phase ion fractionation and enrichment for imaging mass spectrometry**

Boone M. Prentice\*<sup>1,2</sup>, Daniel J. Ryan<sup>3</sup>, Kerri J. Grove<sup>2,4</sup>, D. Shannon Cornett<sup>5</sup>, Richard M. Caprioli<sup>1,2,4,6</sup>, Jeffrey M. Spraggins<sup>1,2,4</sup>

<sup>1</sup>Department of Biochemistry, Vanderbilt University, Nashville, TN 37232; <sup>2</sup>Mass Spectrometry Research Center, Vanderbilt University, Nashville, TN 37232; <sup>3</sup>ExxonMobil Research and Engineering Company, Annandale, NJ 08801; <sup>4</sup>Department of Chemistry, Vanderbilt University, Nashville, TN 37232; <sup>5</sup>Bruker Daltonics, Billerica, MA 01821; <sup>6</sup>Department of Pharmacology and Medicine, Vanderbilt University Medical Center, Nashville, TN 37232

### **Table of Contents**

Figure S1: Coupling transformer for supplemental AC signal

Figure S2: Ion transmission verified before and after hardware modifications

Figure S3: S/N improvements with CASI

Figure S4: Imaging dynamic range improvements with CASI

Figure S5: Imaging sensitivity and dynamic range improvements with SIE

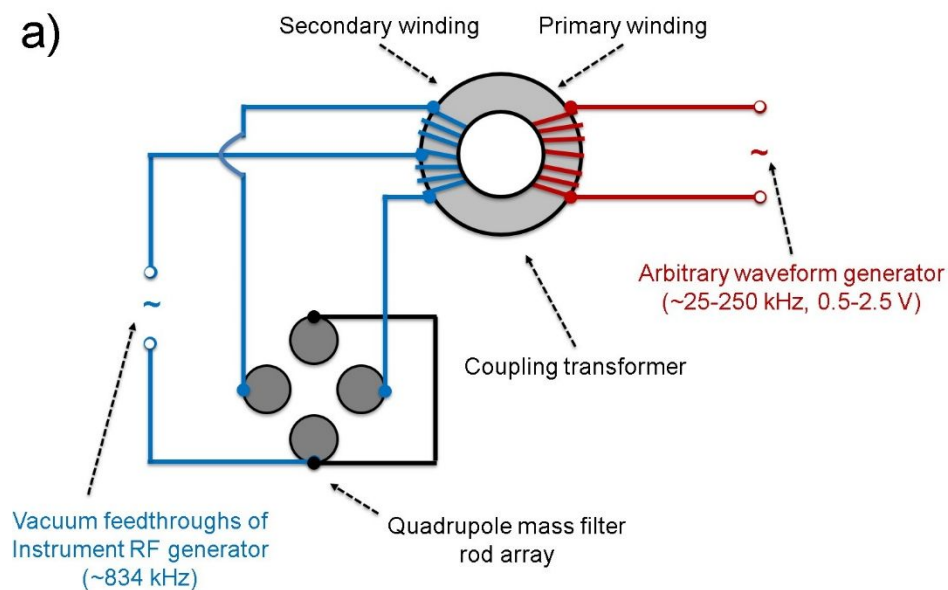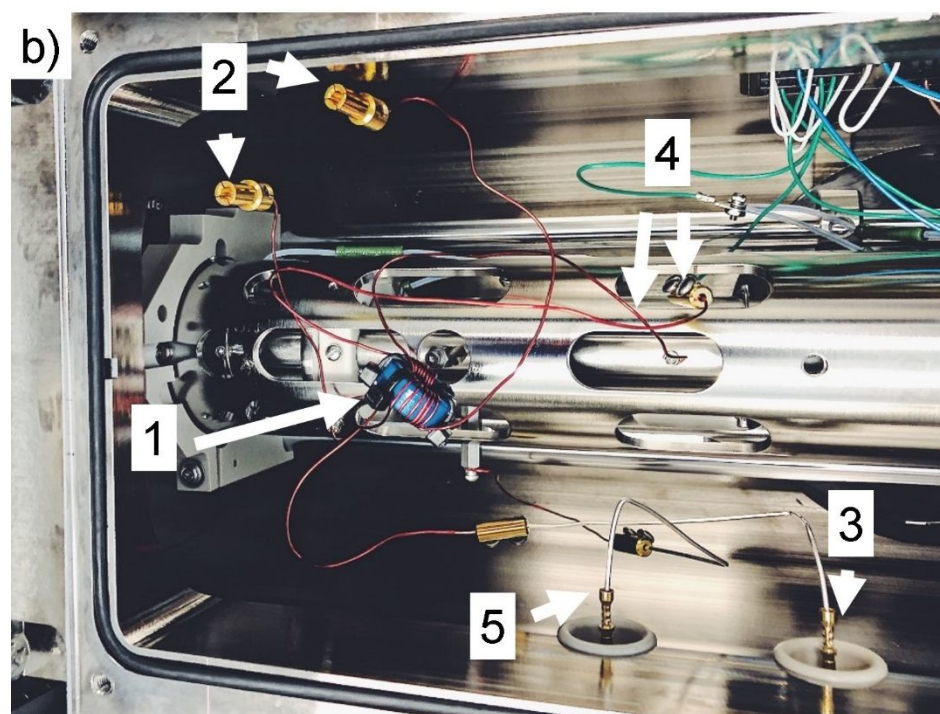

**Figure S1:** a) Schematic of the transformer used to couple the arbitrary waveform generator signal onto the quadrupole mass filter. b) Photograph of the setup. Visible are the (1) transformer, (2) primary winding connections, (3) center tap connection to the instrument RF circuit, (4) secondary winding connections to the quadrupole rod pair, and (5) the unmodified instrument RF connection to the opposing rod pair.

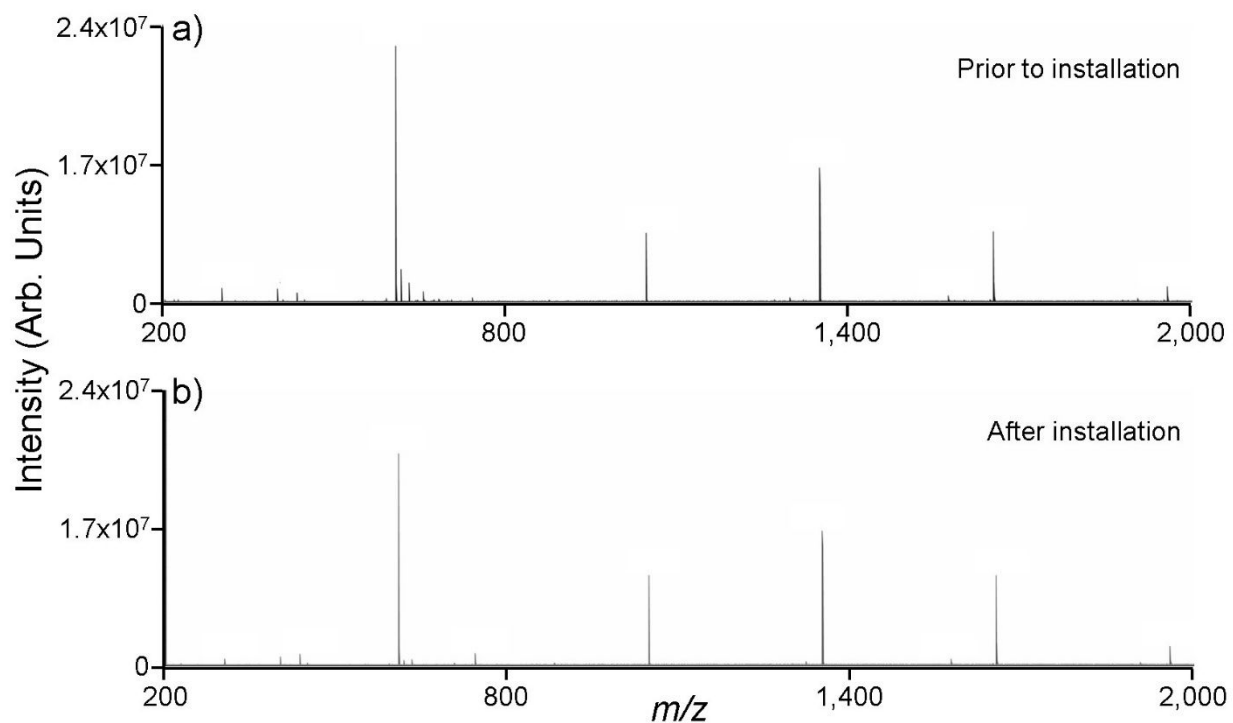

**Figure S2:** Negative ion mode signal derived from an Agilent tune mix solution is nearly identical a) prior to and b) following installation of the coupling transformer. This ensures that no detrimental effects on ion transmission efficiency have been caused by the hardware modifications. This was also confirmed in positive ion mode (data not shown).

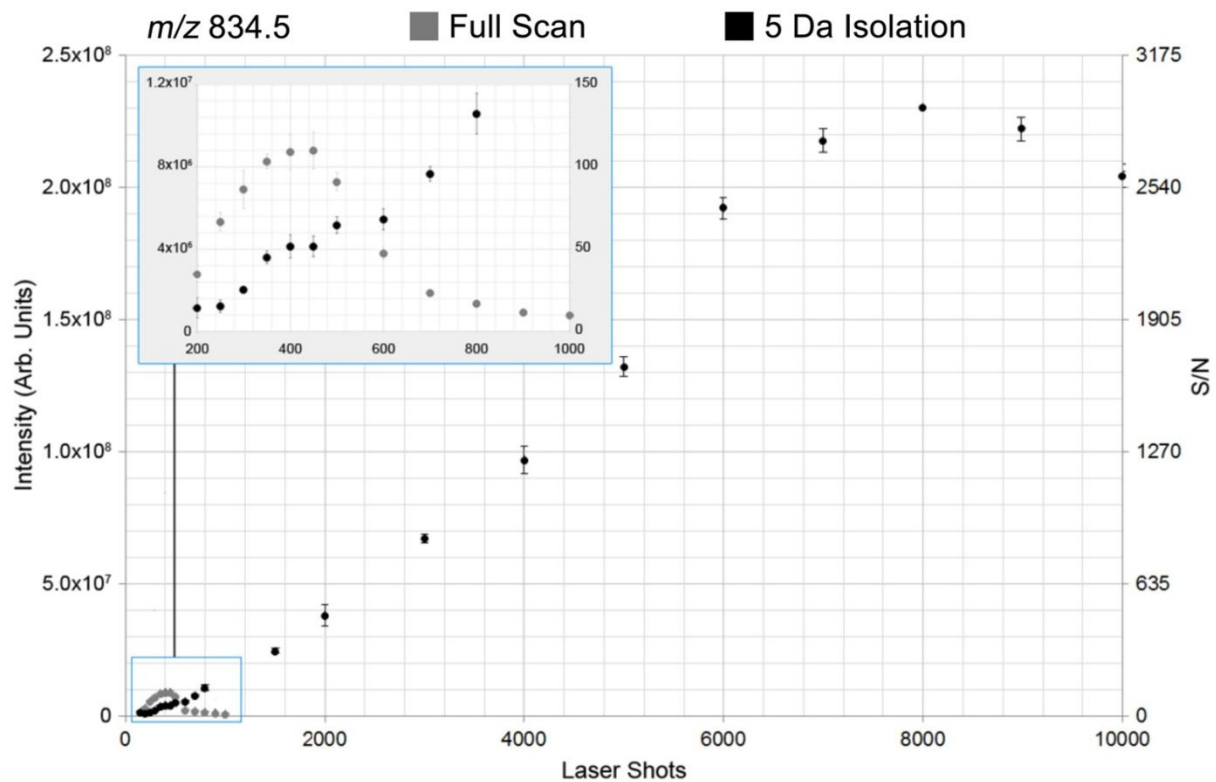

**Figure S3:** The intensity and S/N of  $m/z$  834.529 from a rat brain lipid extract is shown as a function of the number of MALDI laser shots for both the full scan and CASI (5 Da isolation window) acquisition modes. Each measurement represents four averages.

| m/z     | CASI |     |     |    | Full Scan |     |     |     |
|---------|------|-----|-----|----|-----------|-----|-----|-----|
|         | Min  | Max | Avg | SD | Min       | Max | Avg | SD  |
| 808.511 | 4    | 219 | 79  | 32 | 0         | 78  | 13  | 10  |
| 810.683 | 0    | 166 | 61  | 33 | 0         | 23  | 1.3 | 1.7 |
| 816.555 | 0    | 179 | 100 | 36 | 0         | 71  | 7.5 | 7.8 |
| 816.576 | 0    | 168 | 54  | 35 | 0         | 75  | 6.5 | 8.4 |
| 818.571 | 0    | 171 | 66  | 34 | 0         | 69  | 5.8 | 9.3 |
| 834.51  | 1    | 232 | 74  | 39 | 0         | 18  | 3   | 2.7 |
| 834.529 | 0    | 170 | 85  | 47 | 0         | 52  | 15  | 9.7 |
| 835.532 | 0    | 169 | 81  | 45 | 0         | 36  | 13  | 7.7 |
| 836.545 | 0    | 168 | 79  | 42 | 0         | 59  | 12  | 9   |
| 836.528 | 16   | 181 | 116 | 23 | 0         | 82  | 24  | 13  |
| 857.518 | 0    | 170 | 104 | 39 | 0         | 81  | 24  | 13  |

**Figure S4:** Improvements in dynamic range upon CASI as measured by minimum, maximum, average, and standard deviation of pixel intensities. Measurements were made by analyzing rainbow color intensity scale ion images using ImageJ (<https://imagej.nih.gov/ij/>, National Institutes of Health, Bethesda, MD).

| m/z            | Average Intensity   |                     |             | SIE |     |     |     | Full Scan |     |     |     |
|----------------|---------------------|---------------------|-------------|-----|-----|-----|-----|-----------|-----|-----|-----|
|                | SIE                 | Full Scan           | Fold-Change | Min | Max | Avg | SD  | Min       | Max | Avg | SD  |
| <b>699.498</b> | 1.4x10 <sup>7</sup> | 4.2x10 <sup>6</sup> | 3.3         | 6   | 74  | 39  | 15  | 3         | 23  | 13  | 4.2 |
| <b>762.502</b> | 1.1x10 <sup>7</sup> | 3.5x10 <sup>6</sup> | 3.1         | 1   | 86  | 32  | 212 | 0         | 29  | 10  | 6.6 |
| <b>772.585</b> | 3.6x10 <sup>6</sup> | 9.0x10 <sup>5</sup> | 4.0         | 0   | 56  | 27  | 10  | 0         | 16  | 7.3 | 3.4 |
| <b>774.543</b> | 2.9x10 <sup>7</sup> | 6.9x10 <sup>6</sup> | 4.2         | 1   | 125 | 50  | 30  | 0         | 30  | 12  | 6.7 |
| <b>794.570</b> | 4.7x10 <sup>6</sup> | 1.5x10 <sup>6</sup> | 3.1         | 0   | 126 | 37  | 20  | 0         | 41  | 12  | 7.4 |
| <b>804.530</b> | 2.8x10 <sup>6</sup> | 1.0x10 <sup>6</sup> | 2.8         | 0   | 104 | 30  | 29  | 0         | 44  | 11  | 12  |
| <b>816.570</b> | 4.6x10 <sup>5</sup> | 7.0x10 <sup>4</sup> | 6.6         | 0   | 119 | 18  | 22  | 0         | 36  | 3.5 | 6.5 |
| <b>850.572</b> | 8.0x10 <sup>6</sup> | 2.5x10 <sup>6</sup> | 3.2         | 0   | 61  | 21  | 15  | 0         | 20  | 7.2 | 5.1 |
| <b>856.510</b> | 1.6x10 <sup>7</sup> | 4.0x10 <sup>6</sup> | 4.0         | 0   | 75  | 30  | 19  | 0         | 18  | 7.6 | 4.4 |
| <b>860.592</b> | 6.5x10 <sup>6</sup> | 2.2x10 <sup>6</sup> | 3.0         | 0   | 100 | 33  | 29  | 0         | 36  | 12  | 10  |
| <b>916.653</b> | 5.6x10 <sup>6</sup> | 1.8x10 <sup>6</sup> | 3.1         | 0   | 81  | 27  | 22  | 0         | 28  | 10  | 7.6 |
| <b>934.666</b> | 7.2x10 <sup>6</sup> | 1.8x10 <sup>6</sup> | 4.0         | 0   | 110 | 43  | 3.1 | 0         | 29  | 12  | 8.5 |

**Figure S5:** Improvements in sensitivity and dynamic range upon SIE as measured by average ion intensities (*i.e.*, sensitivity) and minimum, maximum, average, and standard deviation of pixel intensities (*i.e.*, dynamic range). The dynamic range measurements were made by analyzing monochromatic ion images using ImageJ (<https://imagej.nih.gov/ij/>, National Institutes of Health, Bethesda, MD).
